# Supplementary material for: Isoindigo-based low bandgap conjugated polymer for o-xylene processed efficient polymer solar cells with thick active layers
Source: Royal Society of Chemistry journal article supplement (doi:10.1039/c5ta05352h), 2015-01-01
Supplement: c5ta05352h1.pdf [file c5ta05352h1.pdf]

## Electronic Supplementary Information

### **Isoindigo-Based Low Bandgap Conjugated Polymer for *o*-Xylene Processed Efficient Polymer Solar Cells with Thick Active Layers**

Xin Dong,<sup>ab</sup> Yunfeng Deng,<sup>a</sup> Hongkun Tian,<sup>\*a</sup> Zhiyuan Xie,<sup>a</sup> Yanhou Geng,<sup>\*a</sup> Fosong Wang<sup>a</sup>

<sup>a</sup>*State Key Laboratory of Polymer Physics and Chemistry, Changchun Institute of Applied Chemistry, Chinese Academy of Sciences Changchun, 130022, P. R. China.*

<sup>b</sup>*University of Chinese Academy of Sciences, Beijing, 100049, P. R. China*

Corresponding author: [yhgeng@ciac.ac.cn](mailto:yhgeng@ciac.ac.cn); [hktian@ciac.ac.cn](mailto:hktian@ciac.ac.cn)

**Fig. S1** Photos of the solutions of P(1FIID-BT) and P(IID-BT) (5 mg/mL) in *o*-xylene prepared at 80 °C after stored at room temperature for 3 hours.. TGA and DSC curves of P(1FIID-BT) and P(IID-BT).

**Table S1.** Molecular Weight and Solubility of P(1FIID-BT) and P(IID-BT).

**Fig. S2** Solution and film absorption spectra and film cyclic voltammograms of P(1FIID-BT) and P(IID-BT).

**Table S2.** Optical and Electrochemical Properties of Polymer

**Fig. S3** Output and transfer characteristics of OFETs based on pristine films of P(1FIID-BT).

**Table S3.** OFET Devices Performance of P(1FIID-BT).

**Fig. S4** Out-of-plane and in-plane XRD patterns of P(1FIID-BT) films before and after thermal annealing at 150 °C for 20 min.

**Fig. S5** AFM height and phase images of P(1FIID-BT) film before and after annealing at 150 °C.

**Fig. S6.** *J*-*V* and EQE curves of PSC devices (P(1FIID-BT)/PC<sub>61</sub>BM = 1:1.5 (w/w)) with a different amount of ODT as additives.

**Table S4.** Device Performance of Conventional PSCs Based on P(1FIID-BT)/PC<sub>61</sub>BM (1:1.5) with Different Amount of Additives.

**Fig. S7.** *J*-*V* and EQE curves of inverted PSC devices with 2% ODT as additives.

**Table S5.** Device Performance of Inverted PSCs Based on P(1FIID-BT)/PC<sub>61</sub>BM with Different Weight Ratio.

**Fig. S8** *J*-*V* characteristics of hole-only and electron-only devices of P(1FIID-BT)/PC<sub>61</sub>BM (1:1.8, w/w).

*Instruments:*  $^1\text{H}$  and  $^{13}\text{C}$  NMR spectra were recorded on a Bruker AV 400 MHz spectrophotometer with chloroform-d ( $\text{CDCl}_3$ ) as solvent and tetramethylsilane (TMS) as an internal standard. High-temperature gel permeation chromatography (GPC) was performed by using 1,2,4-trichlorobenzene as eluent and polystyrene as standard at 150 °C on a PL-GPC 220 system. UV-Vis absorption spectra were measured on a Shimadzu UV3600 UV-vis-NIR spectrometer. Cyclic voltammetry (CV) measurements were carried out on a CHI660a electrochemical workstation using saturated calomel electrode (SEC) as reference electrode, platinum wire as counter electrode and glassy carbon electrode (diameter of 1 cm) as working electrode. TGA was carried out at a heating rate of 10 °C/min under nitrogen flow on a PerkinElmer TGA7. DSC was performed on a PerkinElmer DSC 7 with a heating/cooling rate of  $\pm 10$  °C/min under nitrogen flow. Atomic force microscopy (AFM) measurements were carried out in tapping mode on a SPA400HV instrument with a SPI 3800 controller (Seiko Instruments). Transmission electron microscopy (TEM) images were recorded on a JEM-1011 transmission electron microscope with accelerating voltage of 100 KV and camera length of 160 cm. Thin film XRD were tested on Bruker D8 Discover X-ray diffractometer (out-plane) and Rigaku SmartLab X-ray diffractometer (in-plane) with an incidence angle of  $0.2^\circ$ , Cu  $\text{K}\alpha$  as X-ray source ( $\lambda = 0.154$  nm), tube voltage of 40 KV and electric current of 200 mA. Two dimensional grazing incidence X-ray diffraction (GIXD) was measured at Shanghai Synchrotron Radiation Facility (SSRF) on beam line BL14B1 ( $\lambda = 0.124$  nm) with a MarCCD area detector at incidence angle of  $0.16^\circ$ .

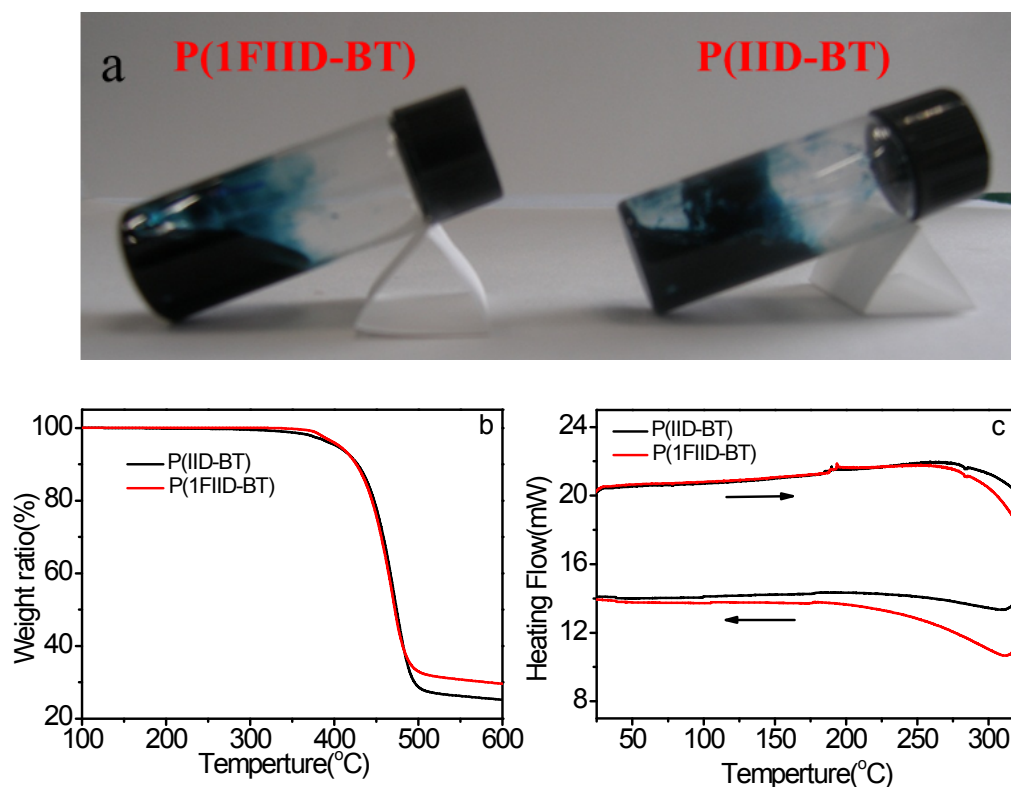

**Fig. S1** (a): Photos of the solutions of P(1FIID-BT) and P(IID-BT) (5 mg/mL) in *o*-xylene prepared at 80 °C after stored at room temperature for 3 hours. P(1FIID-BT) solution was stable while P(IID-BT) began to precipitate. TGA (b) and DSC (c) curves of P(1FIID-BT) and P(IID-BT).

**Table S1.** Molecular Weight and Solubility of P(1FIID-BT) and P(IID-BT).

| polymer     | $M_n$<br>[kDa] | $M_w$<br>[kDa] | $\bar{D}$ | <i>o</i> -DCB <sup>a</sup> | <i>o</i> -xylene <sup>a</sup> |
|-------------|----------------|----------------|-----------|----------------------------|-------------------------------|
| P(IID-BT)   | 25             | 82             | 3.24      | S                          | P                             |
| P(1FIID-BT) | 65             | 219            | 3.36      | S                          | S                             |

<sup>a)</sup> The concentrations of P(1FIID-BT) and P(IID-BT) were 12 mg/mL in *o*-DCB and 5 mg/mL in *o*-xylene. P: precipitation; S: solution.

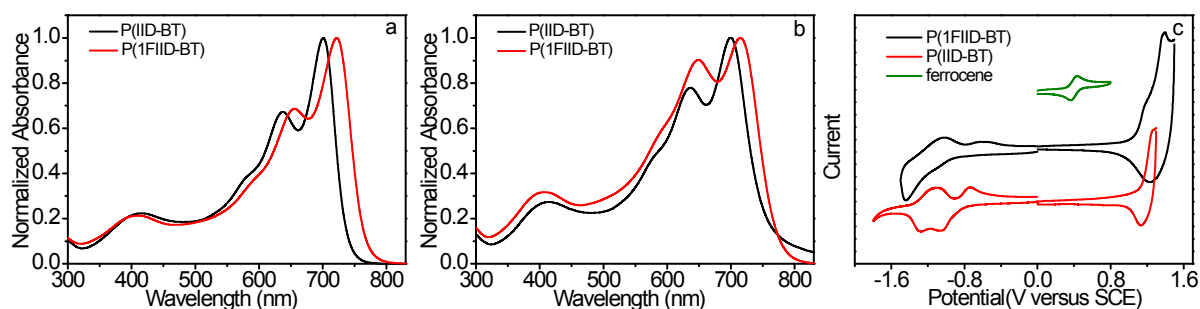

**Fig. S2** Solution (a) ( $1.0 \times 10^{-5}$  mol/mL in *o*-xylene for P(1FIID-BT) and *o*-DCB for P(IID-BT)) and film (b) absorption spectra and film cyclic voltammograms (c) of P(1FIID-BT) and P(IID-BT).

**Table S2.** Optical and Electrochemical Properties of Polymers

| polymer     | UV-vis<br>$\lambda_{max}$ [nm] |             | $E_g^{opt}$<br>[eV] | Cyclic voltammetry       |                          |              |              |
|-------------|--------------------------------|-------------|---------------------|--------------------------|--------------------------|--------------|--------------|
|             | Solution                       | Film        |                     | $E_{onset}^{ox}$<br>[eV] | $E_{onset}^{re}$<br>[eV] | HOMO<br>[eV] | LUMO<br>[eV] |
| P(IID-BT)   | 420/639/701                    | 420/638/701 | 1.65                | 0.64                     | -1.28                    | -5.44        | -3.52        |
| P(1FIID-BT) | 412/658/722                    | 410/650/716 | 1.61                | 0.66                     | -1.23                    | -5.46        | -3.57        |

a) The oxidation and reduction onset potentials of the polymers are versus Fc/Fc<sup>+</sup>.

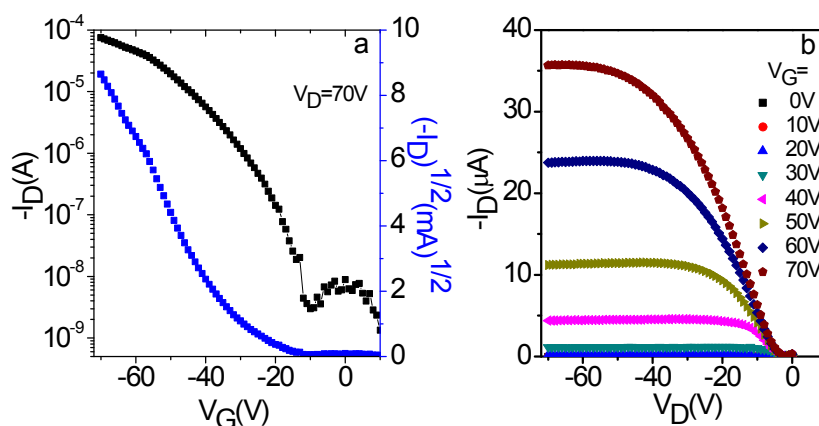

**Figure S3.** Output (a) and transfer (b) characteristics of OFETs based on pristine films of P(1FIID-BT).

**Table S3.** OFET Devices Performance of P(1FIID-BT).

| $T_{postanneal}$<br>[°C] | $\mu_h$<br>[cm <sup>2</sup> v <sup>-1</sup> s <sup>-1</sup> ] | $V_T$<br>[V] | $\text{Log}(I_{on}/I_{off})$ |
|--------------------------|---------------------------------------------------------------|--------------|------------------------------|
| pristine                 | 0.33                                                          | -29.8        | 4-5                          |
| 150                      | 0.42                                                          | -15.5        | 5-6                          |
| 200                      | 0.40                                                          | -6.4         | 5-6                          |

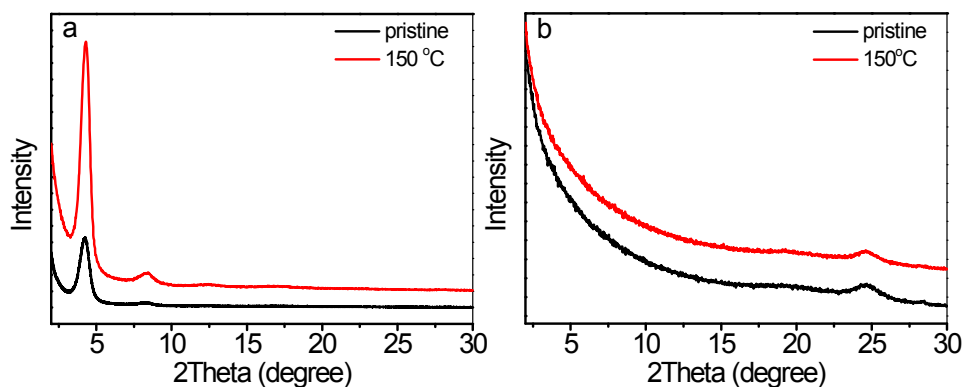

**Fig. S4** Out-of-plane (a) and in-plane (b) XRD patterns of P(1FIID-BT) films before and after thermal annealing (150 °C for 20 min).

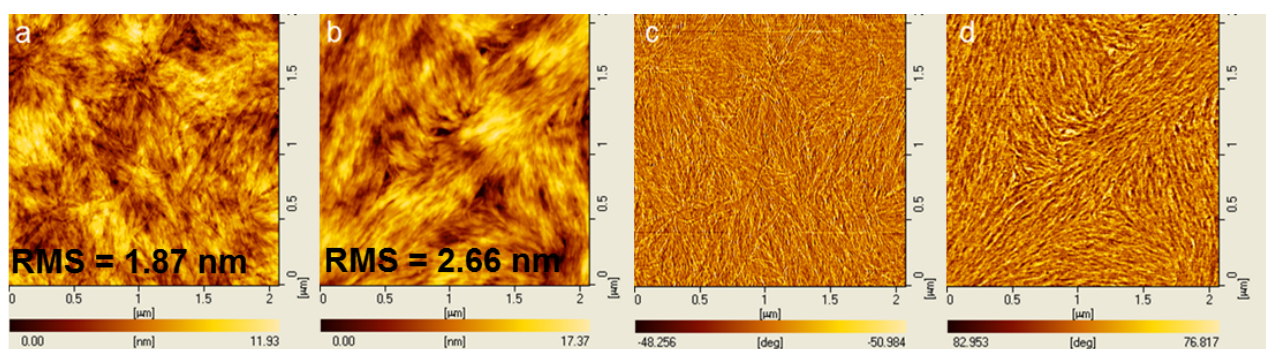

**Fig. S5** AFM height (a, b) and phase images (c, d) of P(1FIID-BT) film before (a, c) and after annealing at 150 °C (b, d).

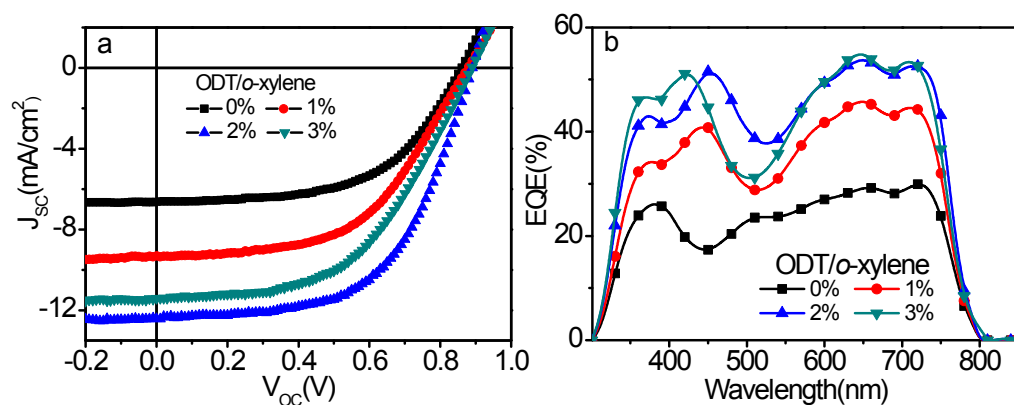

**Fig. S6** J-V (a) and EQE (b) curves of PSC devices (P(1FIID-BT)/PC<sub>61</sub>BM = 1:1.5 (w/w)) with a different amount of ODT as additives.

**Table S4.** Device Performance of Conventional PSCs Based on P(1FIID-BT)/PC<sub>61</sub>BM (1:1.5) with Different Amount of Additives.

| ODT [%] | V <sub>oc</sub> [V] | J <sub>sc</sub> <sup>a</sup> [mA cm <sup>-2</sup> ] | FF   | PCE <sup>b</sup> [%] |
|---------|---------------------|-----------------------------------------------------|------|----------------------|
| 0       | 0.86                | 6.63(6.36)                                          | 0.56 | 3.19(3.16)           |
| 1       | 0.88                | 9.30(9.61)                                          | 0.53 | 4.33(4.31)           |
| 2       | 0.89                | 12.41(11.82)                                        | 0.57 | 6.29(6.00)           |
| 3       | 0.89                | 11.41(11.35)                                        | 0.52 | 5.28(5.15)           |

a) The values in parentheses are calculated from EQE. b) The values in parentheses are the average of 4 devices.

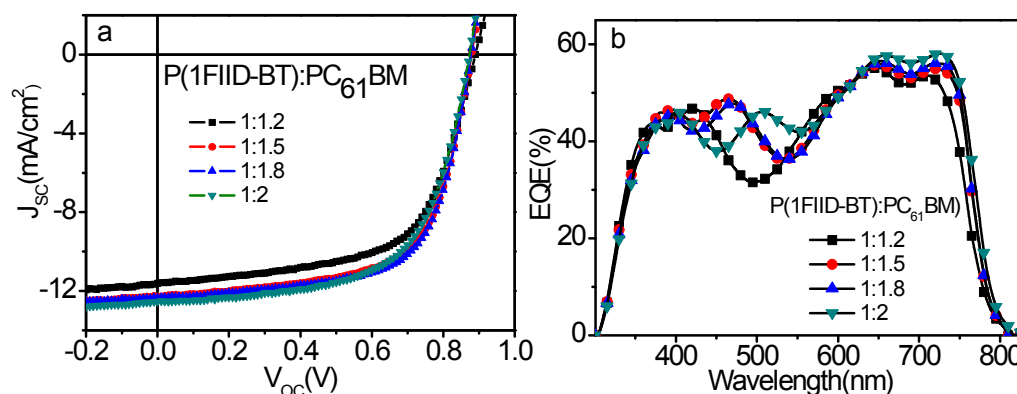

**Fig. S7** *J*-*V* (a) and EQE (b) curves of inverted PSC devices with 2% ODT as additives.

**Table S5.** Device Performance of Inverted PSCs Based on P(1FIID-BT)/PC<sub>61</sub>BM with Different Weight Ratio.<sup>a</sup>

| P(1FIID-BT): PC <sub>61</sub> BM | ODT [%] | V <sub>oc</sub> [V] | J <sub>sc</sub> <sup>b</sup> [mA cm <sup>-2</sup> ] | FF   | PCE <sup>c</sup> [%] |
|----------------------------------|---------|---------------------|-----------------------------------------------------|------|----------------------|
| 1:1.2                            | 2       | 0.89                | 11.61(11.36)                                        | 0.62 | 6.40(6.27)           |
| 1:1.5                            |         | 0.88                | 12.28(12.09)                                        | 0.64 | 6.92(6.81)           |
| 1:1.8                            |         | 0.88                | 12.36(12.08)                                        | 0.65 | 7.07(6.91)           |
| 1:2                              |         | 0.87                | 12.55(12.46)                                        | 0.63 | 6.87(6.83)           |

a) 2 V% DOT was used as additives. b) The values in parentheses were calculated from EQE. c) The values in parentheses are the average of 4 devices.

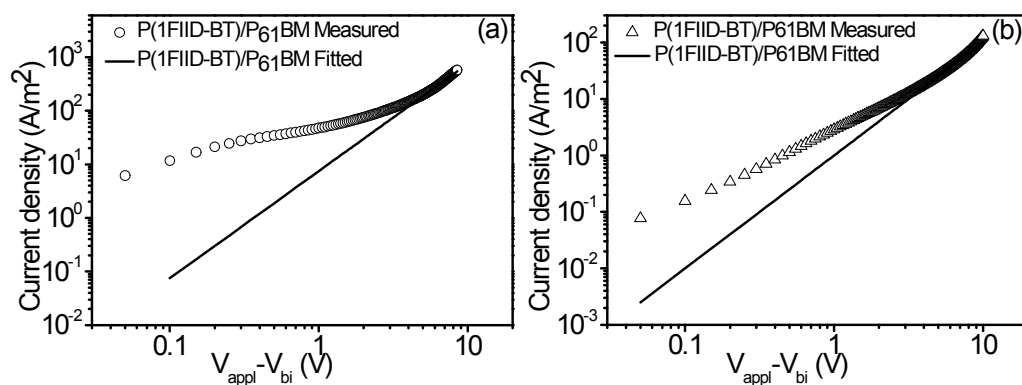

**Fig. S8** *J-V* characteristics of hole-only (a) and electron-only (b) devices of P(1FIID-BT)/PC<sub>61</sub>BM (1:1.8, w/w). Lines represent the fitting results using a model of single-carrier space-charge-limited current with field-dependent mobility. Film thickness was ca. 300 nm.
